# Supplementary material for: The development of Breast Apocrine Carcinoma (BAC) score that distinguishes breast and cutaneous apocrine carcinomas
Source: Research Square preprint supplement (doi:10.21203/rs.3.rs-9642856/v1), 2026-05-26
Supplement: Supplementary file 1 [file a942f352ccb7ef376c0b8ec8.pdf]

**Table S1. Tumor purity of AC samples in the ORIEN and YCU cohorts estimated using the ESTIMATE package.**

| <b>ORIEN<br/>(n = 6)</b> |              | <b>YCU<br/>(n = 6)</b> |              |
|--------------------------|--------------|------------------------|--------------|
| sample                   | tumor purity | sample                 | tumor purity |
| B1                       | 0.678        | B1                     | 0.891        |
| B2                       | 0.679        | B2                     | 0.717        |
| B3                       | 0.710        | B3                     | 0.909        |
| B4                       | 0.744        | B4                     | 0.913        |
| S1                       | 0.736        | S1                     | 0.881        |
| S2                       | 0.647        | S2                     | 0.937        |
| S2                       | 0.647        | S2                     | 0.937        |

B1–B4 indicate breast AC samples, whereas S1–S2 indicate cutaneous AC samples.
